# Supplementary material
Source: Springer Nature journal article supplement (https://www.springermedizin.de/resource/supplementary/13012_2012_605_MOESM3_ESM.pdf/9630372)

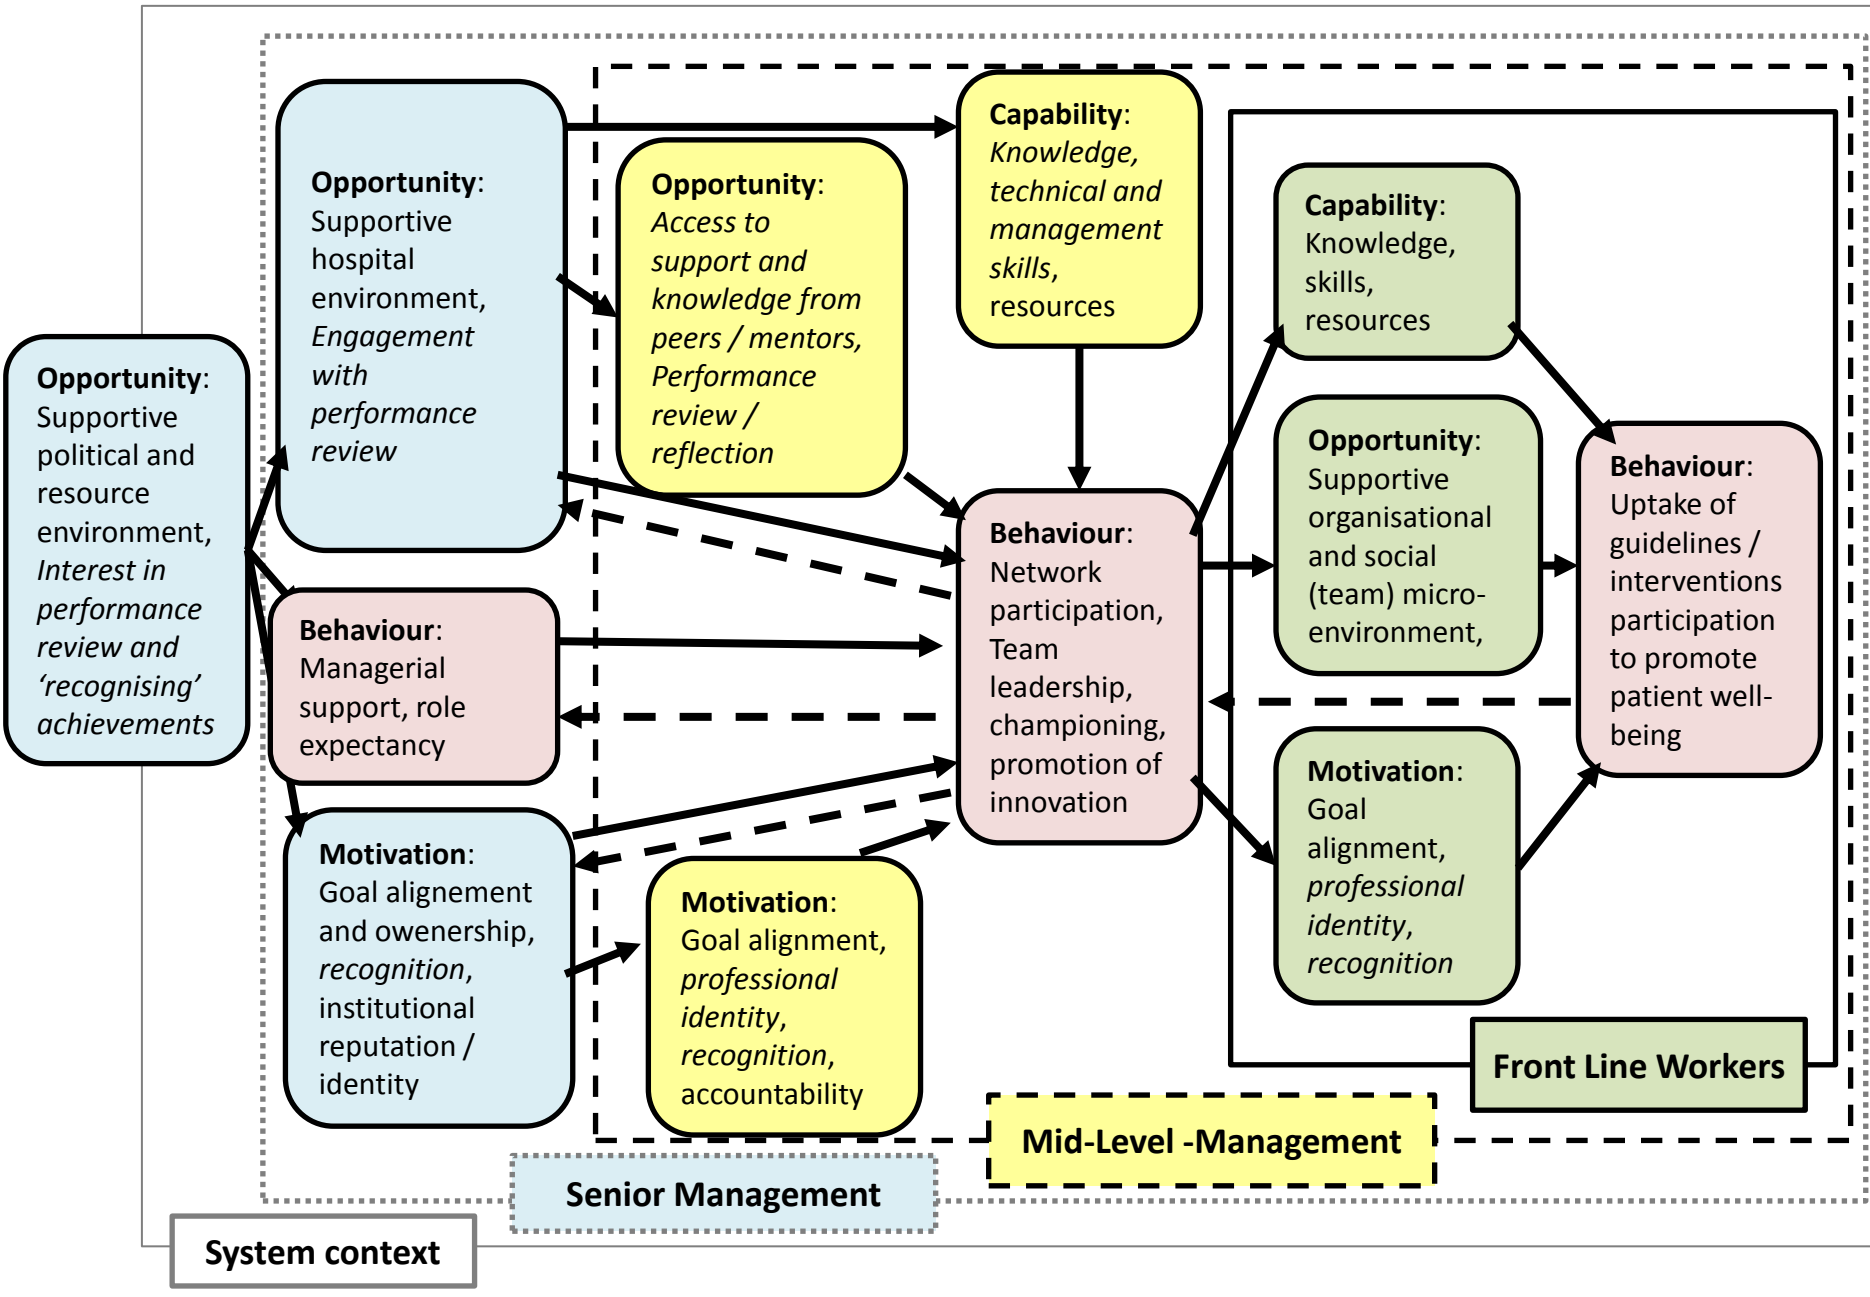

Supplement: MOESM3 [file 9630372]
